# Supplementary material for: Structural insights into the Venus flytrap mechanosensitive ion channel Flycatcher1
Source: PubMed Central journal article supplement (PMC8844309; doi:10.1038/s41467-022-28511-5), 2022-02-14
Supplement: 41467_2022_28511_MOESM3_ESM.pdf [file 41467_2022_28511_MOESM3_ESM.pdf]

## Description of Additional Supplementary Files

File name: Supplementary Movie 1

Description: Trajectory of a typical end-to-end ion crossing event in the presence of a potential difference of  $-450$  mV. The movie covers a duration of 20 ns. Residues lining the side portal of entry are colored by type. The ring of F572 residues is colored in pink. Trajectory smoothing is applied (averaged across 8 ps).

File name: Supplementary Movie 2

Description: 3D EM Variability analysis of FLYC1. First variability component of FLYC1 after C7 symmetry expansion. Densities have been low-pass filtered to  $6\text{\AA}$  and high-pass filtered to  $20\text{\AA}$ . Appearance of N-terminus peptide and lipid-like density at the top of the channel are shown associated to the down class.
